# Supplementary material for: Control of organelle gene expression by the mitochondrial transcription termination factor mTERF22 in Arabidopsis thaliana plants
Source: PubMed Central journal article supplement (PMC6066234; doi:10.1371/journal.pone.0201631), 2018-07-30
Supplement: pone.0201631.s001.pdf [file pone.0201631.s001.pdf]

**S1 Table. List of primers used in gene expression studies, GFP localizations analyses and mutant plants screening.**

| Target gene                              | oligo name           | oligonucleotide sequence (5'-to-3')  |
|------------------------------------------|----------------------|--------------------------------------|
| <i>mterf22</i><br>(At5g64950)            | <i>mterf22F</i>      | ATCCAGCGTTCGTCGAGTTT                 |
|                                          | <i>mterf22R</i>      | AGCAAGCTGAGACCCAACAA                 |
| <i>mterf22</i><br>GFP-localization assay | <i>NcoInewF</i>      | CAAGATCCATGGTACAATTTCTAGCTTCTCTCGTTT |
|                                          | <i>BamHInewR</i>     | GATATAGGATCCCGAACATCATTTCGAGGATGGA   |
|                                          | <i>Sat6-EcorIF</i>   | ACATAGGAATTCTTCCCAGTCACGACGTTGTA     |
|                                          | <i>Sat6-SmaIR</i>    | ACATAGCCCAGGCGAGCTATGACCATGATTACTG   |
| T-DNA screening                          | <i>mterf22.1R</i>    | AGCAAGCTGAGACCCAACAA                 |
|                                          | <i>mterf22.2F</i>    | GTTTGGTCGGAGATGGGAT                  |
|                                          | <i>mterf22.3R</i>    | GAGAGACGAACTTACCAAGA                 |
|                                          | <i>Lbb1.3</i> (SALK) | ATTTTGCCGATTCGGAAC                   |
|                                          | <i>LB3</i> (SAIL)    | GCCTTTTCAGAAAATGGATAAATAGCCTTGCTTCC  |
| <i>actin2</i><br>(AT3G18780)             | <i>actin2-F</i>      | GGTAACATTGTGCTCAGTGGTGG              |
|                                          | <i>actin2-R</i>      | AACGACCTTAATCTTCATGCTGC              |
| <i>mTERF7</i> (At5g07900)                | <i>mterf7-F</i>      | AGGATTATCCCGAGGTGTTCCGG              |
|                                          | <i>mterf7-R</i>      | ATCCTCTTTCACAAGCCCGTTTCG             |
| <i>mTERF22</i> (At5g07900)               | <i>mterf22-F</i>     | TGTCTCTCGTGCTTTGGATCTTGG             |
|                                          | <i>mterf22-R</i>     | AACAGCGTGCACAAGCATCCTC               |
| <i>mTERF27</i> (At5g07900)               | <i>mterf27-F</i>     | ACCATGGCTTCACCAATGACCAG              |
|                                          | <i>mterf27-R</i>     | TACATCTTCCGGGCTCAGTGAC               |
| <i>AOX2</i> (At5g64210)                  | <i>AOX2-F</i>        | ACGGTGATTCTGTGCTGATGAAGC             |
|                                          | <i>AOX2-R</i>        | TCCTTGATTGCGAATGTCAGAAGC             |
| <i>AOX1A</i> (At3g22370)                 | <i>AOX1A -F</i>      | AGCATCATGTTCCAACGACGTTTC             |
|                                          | <i>AOX1A -R</i>      | GCTCGACATCCATATCTCCTCTGG             |
| <i>AOX1B</i> (At3g22360)                 | <i>AOX1B -F</i>      | GGACCGTGAAATCTCTTCGATGGC             |
|                                          | <i>AOX1B -R</i>      | TCTAGCATCATTGCTCTGCATCCG             |
| <i>AOX1C</i> (At3g27620)                 | <i>AOX1C -F</i>      | TCTCCAGAGGAGGTATGGTTGCC              |
|                                          | <i>AOX1C -R</i>      | AGTGCATAAGCATCCCTCCAACC              |
| <i>AOX1D</i> (At1g32350)                 | <i>AOX1D -F</i>      | TTTGCTCGAAGAGGCTGAGAACG              |
|                                          | <i>AOX1D -R</i>      | CTCGTTTCGTACCATTTGGGTTGTG            |
| <i>NDA1</i> (At1g07180)                  | <i>NDA1 -F</i>       | GTATCCAACCGGCGATTCACG                |
|                                          | <i>NDA1 -R</i>       | AGTTACAGTCTCAATGCACCTC               |
| <i>NDA2</i> (At2g29990)                  | <i>NDA2 -F</i>       | TGGTGTGGTCCCTCTCCTTTCG               |
|                                          | <i>NDA2 -R</i>       | TCCATTCTGCAATGCCAATCCTTC             |
| <i>NDB1</i> (At4g28220)                  | <i>NDB1 -F</i>       | TAACACATTTGGCACTCCTGGTG              |
|                                          | <i>NDB1 -R</i>       | CTCTGTGCATCCTCTACTTCCTTG             |
| <i>NDB2</i> (At4g05020)                  | <i>NDB2 -F</i>       | AGGAGGAGAGGTTTCCCTCGATTC             |
|                                          | <i>NDB2 -R</i>       | CAGAGCTCGTCTATTACCCTGACC             |
| <i>NDB3</i> (At4g21490)                  | <i>NDB3 -F</i>       | TCCAGGAGACTGGGTTTCGATAGG             |
|                                          | <i>NDB3 -R</i>       | GCCAGCTCACTTGCTTACTAGC               |
| <i>NDB4</i> (At2g20800)                  | <i>NDB4 -F</i>       | GTGGTCAACAGGAATTGGTTACAG             |
|                                          | <i>NDB4 -R</i>       | AAGACACGTCTCTGTCCCTGAC               |
| <i>NDC1</i> (At5g08740)                  | <i>NDC1 -F</i>       | CGAGAGCAGTGACAAACAACAGTG             |
|                                          | <i>NDC1 -R</i>       | AATGCACACCCTTGGCCTCTTG               |
