# Supplementary material for: Control of organelle gene expression by the mitochondrial transcription termination factor mTERF22 in Arabidopsis thaliana plants
Source: PubMed Central journal article supplement (PMC6066234; doi:10.1371/journal.pone.0201631), 2018-07-30
Supplement: pone.0201631.s002.pdf [file pone.0201631.s002.pdf]

**S2 Table. List of antibodies used for the analysis of *mterf22* mutants.**

| Antibody     | Protein I.D.                                | origin                      | serum               | dilution | Reference / source                                          |
|--------------|---------------------------------------------|-----------------------------|---------------------|----------|-------------------------------------------------------------|
| AtpA         | Mitochondrial ATP-synthase subunit $\alpha$ | <i>Zea mays</i>             | Mouse (monoclonal)  | 1/5,000  | (Michael <i>et al.</i> 1993)                                |
| AtpB         | Mitochondrial ATP-synthase subunit $\beta$  | <i>Zea mays</i>             | Mouse (monoclonal)  | 1/5,000  | (Michael <i>et al.</i> 1993)                                |
| CA2          | $\gamma$ -carbonic anhydrase-like subunit 2 | <i>Arabidopsis thaliana</i> | Rabbit (polyclonal) | 1/1,000  | (Perales <i>et al.</i> 2005, Sunderhaus <i>et al.</i> 2006) |
| Cox2         | Cytochrome oxidase subunit-2                | <i>Arabidopsis thaliana</i> | Rabbit (polyclonal) | 1/5,000  | Agrisera antibodies, AS04 053A                              |
| Nad9         | NADH-dehydrogenase complex subunit-9        | <i>Triticum spp.</i>        | Rabbit (polyclonal) | 1/50,000 | (Lamattina <i>et al.</i> 1993)                              |
| RISP         | Rieske iron-sulfur protein                  | <i>Arabidopsis thaliana</i> | Rabbit (polyclonal) | 1/5,000  | Gift of Prof. Ian Small, UWA                                |
| RbcL         | Large subunit of chloroplast Rubisco enzyme | <i>Pisum sativum</i>        | Rabbit (polyclonal) | 1/1,000  | Gift of Prof. Michal Shapira, BGU                           |
| SHMT1        | Serine hydroxymethyltransferase 1           | <i>Spinacia oleracea</i>    | Rabbit (polyclonal) | 1/1,000  | Agrisera antibodies, AS05 075                               |
| Porin (VDAC) | Voltage-dependent anion channel             | <i>Zea mays</i>             | Mouse (monoclonal)  | 1/5,000  | Thomas Elthon collection, PM035                             |

## References

- Keren, I., Bezawork-Geleta, A., Kolton, M., Maayan, I., Belausov, E., Levy, M., Mett, A., Gidoni, D., Shaya, F. and Ostersetzer-Biran, O. (2009) AtnMat2, a nuclear-encoded maturase required for splicing of group-II introns in Arabidopsis mitochondria. *RNA*, **15**, 2299-2311.
- Lamattina, L., Gonzalez, D., Gualberto, J. and Grienenberger, J.-M. (1993) Higher plant mitochondria encode an homologue of the nuclear-encoded 30-kDa subunit of bovine mitochondrial complex I. *Eur J Biochem*, **217**, 831-838.
- Matthes, A., Schmidt-Gattung, S., Köhler, D., Forner, J., Wildum, S., Raabe, M., Urlaub, H. and Binder, S. (2007) Two DEAD-Box Proteins May Be Part of RNA-Dependent High-Molecular-Mass Protein Complexes in Arabidopsis Mitochondria. *Plant Physiol*, **145**, 1637-1646.
- Michael, H.L., Arnost, H. and Elthon, T.E. (1993) Monoclonal Antibodies to the a- and b- Subunits of the Plant Mitochondrial F<sub>1</sub>-ATPase. *Plant Physiology*, **101**, 931-937.
- Perales, M., Eubel, H., Heinemeyer, J., Colaneri, A., Zabaleta, E. and Braun, H.-P. (2005) Disruption of a nuclear gene encoding a mitochondrial gamma carbonic anhydrase reduces complex I and supercomplex I+III2 levels and alters mitochondrial physiology in Arabidopsis. *J Mol Biol*, **350**, 263-277.
- Sunderhaus, S., Dudkina, N.V., Jansch, L., Klodmann, J., Heinemeyer, J., Perales, M., Zabaleta, E., Boekema, E.J. and Braun, H.P. (2006) Carbonic anhydrase subunits form a matrix-exposed domain attached to the membrane arm of mitochondrial complex I in plants. *J Biol Chem*, **281**, 6482-6488.
