# Supplementary material for: Control of organelle gene expression by the mitochondrial transcription termination factor mTERF22 in Arabidopsis thaliana plants
Source: PubMed Central journal article supplement (PMC6066234; doi:10.1371/journal.pone.0201631), 2018-07-30
Supplement: pone.0201631.s003.pdf [file pone.0201631.s003.pdf]

**S3 Table. List of primers used in mitochondria transcriptome and splicing analyses by RT-qPCR.**

| gene target    | oligo name     | sequence (5'-to-3')       |
|----------------|----------------|---------------------------|
| <i>AOX1A</i>   | <i>aox1aF</i>  | AGCATCATGTTCCAACGACGTTTC  |
|                | <i>aox1aR</i>  | GCTCGACATCCATATCTCCTCTGG  |
| <i>AOX1B</i>   | <i>aox1bF</i>  | GGACCGTGAAATCTCTTCGATGGC  |
|                | <i>aox1bR</i>  | TCTAGCATCATTGCTCTGCATCCG  |
| <i>AOX1C</i>   | <i>aox1cF</i>  | TCTTCCAGAGGAGGTATGGTTGCC  |
|                | <i>aox1cR</i>  | AGTGCATAAGCATCCCTCCAACC   |
| <i>AOX1D</i>   | <i>aox1dF</i>  | TTTGCTCGAAGAGGCTGAGAACG   |
|                | <i>aox1dR</i>  | CTCGTTTCGTACCATTGGGTTGTG  |
| <i>AOX2</i>    | <i>aox2F</i>   | ACGGTGATTTCGTGCTGATGAAGC  |
|                | <i>aox2R</i>   | TCCTTGATTGCGAATGTCAGAAGC  |
| <i>NDA1</i>    | <i>nda1F</i>   | GTATCCAACCGCGGATTTACAG    |
|                | <i>nda1R</i>   | AGTTACAGTCTACAATGCACCTC   |
| <i>NDA2</i>    | <i>nda2F</i>   | TGGTGTGGTCCTTCTCCTTTCG    |
|                | <i>nda2R</i>   | TCCATTTCGTCATGCCAATCCTTC  |
| <i>NDB1</i>    | <i>ndb1F</i>   | TAACACATTTGGCACTCTGGTG    |
|                | <i>ndb1R</i>   | CTCTGTGCATCCTCTACTTCTCTTG |
| <i>atp1</i>    | <i>atp1F</i>   | TCACTTCGACACGTCTTTGC      |
|                | <i>atp1R</i>   | GGAATGGCCTTGAATCTTGA      |
| <i>atp6</i>    | <i>atp6-1F</i> | TCTTTTGCAGTCAATGCAC       |
|                | <i>atp6-1R</i> | TCTCGCGTATCTCACATTGC      |
| <i>atp8</i>    | <i>atp8F</i>   | CCGTCGACTTATTGGGAAAA      |
|                | <i>atp8R</i>   | TTCTTGGCCATGTACAACA       |
| <i>atp9</i>    | <i>atp9F</i>   | CATTCCCTCTGACGTCAAT       |
|                | <i>atp9R</i>   | TCGTGATTCTTACCCTCGT       |
| <i>atp4</i>    | <i>atp4F</i>   | GGATCAGCTTGCGAATTTGT      |
|                | <i>atp4R</i>   | GCAAATTGCTTCCCCACTAA      |
| <i>ccb</i>     | <i>ccbF</i>    | TCTTGGAAATCACATCCAGCA     |
|                | <i>ccbR</i>    | CGAGACCGAAATTGGAAAAA      |
| <i>ccmc</i>    | <i>ccmCF</i>   | AGCTACGCGCAAATTTTCAT      |
|                | <i>ccmCR</i>   | GCCGTGGCGATATAACAAT       |
| <i>ccmfc</i>   | <i>ccmFcF</i>  | CACATGGAGGAGTGTGCATC      |
|                | <i>ccmFcR</i>  | GTGGGTCCATGTAAATGATCG     |
| <i>ccmfn-1</i> | <i>ccmFN1F</i> | AGCTCTTGGCATTGCTTTGT      |
|                | <i>ccmFN1R</i> | AGTGCCACAATCCCATTTCAT     |
| <i>ccmfn-2</i> | <i>ccmFN2F</i> | CGTGTCTGTCGTAATGAAA       |
|                | <i>ccmFN2R</i> | TGATAAGCCCACTTCC          |
| <i>cob</i>     | <i>cobF</i>    | TGCCGGAATGGTATTTCTA       |
|                | <i>cobR</i>    | GCCAAAAGCAACCAAAACAT      |
| <i>cox1</i>    | <i>cox1F</i>   | GTAGCTGCGGTGAAGTAGGC      |
|                | <i>cox1R</i>   | CTGCCTGGATTTCGGTATCAT     |

|                       |                        |                             |
|-----------------------|------------------------|-----------------------------|
| <i>cox2</i>           | <i>cox2F</i>           | TGATGCTGTACCTGGTCGTT        |
|                       | <i>cox2R</i>           | TGGGGGATTAATTGATTGGA        |
| <i>cox3</i>           | <i>cox3F</i>           | CCGTAACTTGGGCTCATCAT        |
|                       | <i>cox3R</i>           | AAACCATGAAAGCCTGTTGC        |
| <i>mttb</i>           | <i>mttBF</i>           | GGGGTCTTTCTTTGGAAACC        |
|                       | <i>mttBR</i>           | TCTCCCTCATTCCACTCGTC        |
| <i>nad1 exons a-b</i> | <i>nad1 1-2F</i>       | GACCAATAGATACTTCATAAGAGACCA |
|                       | <i>nad1 1-2R</i>       | TTGCCATATCTTCGCTAGGTG       |
| <i>nad1 exons b-c</i> | <i>nad1 2-3F</i>       | ATTCAGCTTCCGCTTCTGG         |
|                       | <i>nad1 2-3R</i>       | TCTGCAGCTCAAATGGTCTC        |
| <i>nad1 exons c-d</i> | <i>nad1 3-4F</i>       | AAAAGAGCAGACCCATTGA         |
|                       | <i>nad1 3-4R</i>       | TCCGTTTGATCTCCAGAAG         |
| <i>nad1 exons d-e</i> | <i>nad1 4-5F</i>       | AGCCCGGATCTTCTTGA           |
|                       | <i>nad1 4-5R</i>       | TCTTCAATGGGGTCTGCTC         |
| <i>nad2 exons a-b</i> | <i>nad2 exons a-bF</i> | GCGAGCAGAAGCAAGTTAT         |
|                       | <i>nad2 exons a-bR</i> | GGATCCTCCACACATGTTT         |
| <i>nad2 exons b-c</i> | <i>nad2 exons b-cF</i> | AAAGGAAGTGCAGTGATCTTGA      |
|                       | <i>nad2 exons b-cR</i> | AATATTTGATCTTAGGTGCATTTT    |
| <i>nad2 exons c-d</i> | <i>nad2 exons c-dF</i> | GCGCAATAGAAAGGAATGCT        |
|                       | <i>nad2 exons c-dR</i> | CTATGGGTCTACTGGAGCTACCC     |
| <i>nad2 exons d-e</i> | <i>nad2 exons d-eF</i> | CAAAGGAGAGGGGTATAGCAA       |
|                       | <i>nad2 exons d-eR</i> | TATTTGTTCTTCGCCGCTTT        |
| <i>nad3</i>           | <i>nad3F</i>           | CGAATGTGGTTTCGATCCTT        |
|                       | <i>nad3R</i>           | GCACCCCTTTCCATTCATA         |
| <i>nad4 exons a-b</i> | <i>nad4 exons a-bF</i> | ATTCTATGTTTTCCCGAAAAGC      |
|                       | <i>nad4 exons a-bR</i> | GAAAAACTGATATGCTGCCTTG      |
| <i>nad4 exons b-c</i> | <i>nad4 exons b-cF</i> | AATACCCATGTTTCCCGAAG        |
|                       | <i>nad4 exons b-cR</i> | TGCTACCTCCAATTCCTGT         |
| <i>nad4 exons c-d</i> | <i>nad4 exons c-dF</i> | TTCTCCATAAATTCTCCGATT       |
|                       | <i>nad4 exons c-dR</i> | TGAAATTTGCCATGTTGCAC        |
| <i>nad4L</i>          | <i>nad4L-F</i>         | GGGGAATCCTCCTTAATAGACG      |
|                       | <i>nad4L-R</i>         | AACGAAAATGGCTAACCCAATA      |
| <i>nad5 exons a-b</i> | <i>nad5 exons a-bF</i> | TGGACCAAGCTACTTATGGATG      |
|                       | <i>nad5 exons a-bR</i> | CCATGGATCTCATCGGAAAT        |
| <i>nad5 exons b-c</i> | <i>nad5 exons b-cF</i> | TACCTAAACCAATCATCATATC      |
|                       | <i>nad5 exons b-cR</i> | CTGGCTCTCGGGAGTCTCTT        |
| <i>nad5 exons c-d</i> | <i>nad5 exons c-dF</i> | AACTCGGATTCGGCAAGAA         |
|                       | <i>nad5 exons c-dR</i> | GATATGATGATTGGTTTAGGTA      |
| <i>nad5 exons d-e</i> | <i>nad5 exons d-eF</i> | AACATTGCAAAGGCATAATGA       |
|                       | <i>nad5 exons d-eR</i> | GTTCTGCGTTTCGGATATG         |
| <i>nad6</i>           | <i>nad6F</i>           | TATGCCGAAAAGGTACGAAG        |
|                       | <i>nad6R</i>           | GTGAGTGGGTCAGTCGTCCT        |
| <i>nad7 exons a-b</i> | <i>nad7 exons a-bF</i> | ACCTCAACATCCTGCTGCTC        |
|                       | <i>nad7 exons a-bR</i> | AAGGTAAAGCTTGAAGATAAGTTTTGT |

|                             |                        |                             |
|-----------------------------|------------------------|-----------------------------|
| <i>nad7 exons b-c</i>       | <i>nad7 exons b-cF</i> | GAGGGACTGAGAAATTAATAGAGTACA |
|                             | <i>nad7 exons b-cR</i> | TGGTACCTCGCAATTCAAAA        |
| <i>nad7 exons c-d</i>       | <i>nad7 exons c-dF</i> | ACTGTCACTGCACAGCAAGC        |
|                             | <i>nad7 exons c-dR</i> | CATTGCACAATGATCCGAAG        |
| <i>nad7 exons d-e</i>       | <i>nad7 exons d-eF</i> | GATCAAAGCCGATGATCGTAA       |
|                             | <i>nad7 exons d-eR</i> | AGGTGCTTCAACTGCGGTAT        |
| <i>nad9</i>                 | <i>nad9F</i>           | GGATGACCCTCGAAACCATA        |
|                             | <i>nad9R</i>           | CACGCATTTCGTGTACAAACC       |
| <i>rpl2</i>                 | <i>rpl2F</i>           | CCGAAGACGGATCAAGGTAA        |
|                             | <i>rpl2R</i>           | CGCAATTCATCACCATTTTG        |
| <i>rpl5</i>                 | <i>rpl5F</i>           | AAGGGGTTTCGACAGGAAAGT       |
|                             | <i>rpl5R</i>           | CGTATTTTCGACCGGAAAATC       |
| <i>rpl16</i>                | <i>rpl16F</i>          | GAGCATTTGCCAAACTCACA        |
|                             | <i>rpl16R</i>          | CGGACACTTTCATCGTGCTA        |
| <i>rps3</i>                 | <i>rps3F</i>           | CCGATTTTCGGTAAGACTTGG       |
|                             | <i>rps3R</i>           | AGCCGAAGGTGAGTCTCGTA        |
| <i>rps4</i>                 | <i>rps4F</i>           | ACCCATCACAGAGATGCACA        |
|                             | <i>rps4R</i>           | TCACACAAACCCTTCGATGA        |
| <i>rps7</i>                 | <i>rps7F</i>           | CTCGAACTGAACCGCATGTA        |
|                             | <i>rps7R</i>           | AAGCTGCTTCAAGGATCCAA        |
| <i>rps12</i>                | <i>rps12F</i>          | AGCCAAAGTACGGTTGAGCA        |
|                             | <i>rps12R</i>          | TTTGGGTTTTTCTGCACCAT        |
| <i>rrn18</i>                | <i>rrn18F</i>          | CGTCACCTGGGTCAAAAACCT       |
|                             | <i>rrn18R</i>          | GCTTGAAAACCGAAGTGAGC        |
| <i>rrn26</i>                | <i>rrn26F</i>          | GACGAGACTTTCGCCTTTTG        |
|                             | <i>rrn26R</i>          | CTTGAGCGAATTGGATGAT         |
| <i>18S rRNA (At3g41768)</i> | <i>18S nucl-F</i>      | AAACGGCTACCACATCCAAG        |
|                             | <i>18S nucl-R</i>      | ACTCGAAAGAGCCCGGTATT        |
| <i>actin2 (At3g18780)</i>   | <i>actin2-F</i>        | GGTAACATTGTGCTCAGTGGTGG     |
|                             | <i>actin2-R</i>        | AACGACCTTAATCTTCATGCTGC     |
