# Supplementary material for: Control of organelle gene expression by the mitochondrial transcription termination factor mTERF22 in Arabidopsis thaliana plants
Source: PubMed Central journal article supplement (PMC6066234; doi:10.1371/journal.pone.0201631), 2018-07-30
Supplement: pone.0201631.s004.pdf [file pone.0201631.s004.pdf]

**S4 Table. Germination rates in wild-type (Col-0) and mutant plants**

| mutant lines                       | 22°C                        |                       | 28°C                        |                       |
|------------------------------------|-----------------------------|-----------------------|-----------------------------|-----------------------|
|                                    | Number of germinating seeds | Germination rates (%) | Number of germinating seeds | Germination rates (%) |
| Col-0                              | 242/243                     | 99.6                  | 79/87                       | 90.1                  |
| <i>nmatl</i> <sup>*1</sup>         | 161/211                     | 76.3                  | 95/124                      | 76.6                  |
| <i>mterf22-1</i> heterozygote line | 204/208                     | 98.1                  | 59/95                       | 90.8                  |
| <i>mterf22-1</i> homozygous line   | 207/208                     | 99.5                  | 83/106                      | 78.3                  |
| <i>mterf22-2</i> homozygous line   | 124/127                     | 97.6                  | 114/137                     | 80.3                  |
| <i>mterf22-3</i> homozygous line   | 157/161                     | 97.5                  | 88/102                      | 86.3                  |

\*1 – A T-DNA insertional line mutant in *nMAT1* (At1g30010) gene (see Keren *et al.* 2012).
